# Supplementary material for: Safety of Chuna Manipulation Therapy in 289,953 Patients with Musculoskeletal Disorders: A Retrospective Study
Source: MDPI journal article supplement (doi:10.3390/healthcare10020294), 2022-02-02
Supplement: s1 [file s1]

## Supplementary Material

**Table S1.** Cohen's kappa coefficients for concordance between the actual observed and chance agreements in different hospitals.

| Hospital     | Actual observed agreement | Chance agreement | Kappa<br>(95% confidence interval) |
|--------------|---------------------------|------------------|------------------------------------|
| Gangnam      | 0.995                     | 0.957            | 0.877 (0.739–1.000)                |
| Bucheon      | 1                         | 0.990            | 1.000 (1.000–1.000)                |
| Daejeon      | 1                         | 0.994            | 1.000 (1.000–1.000)                |
| Haeundae     | 1                         | 0.997            | 1.000 (1.000–1.000)                |
| Ulsan        | 1                         | 0.965            | 1.000 (1.000–1.000)                |
| Gwanghwamoon | 0.992                     | 0.863            | 0.943 (0.865–1.000)                |
| Ansan        | 1                         | 0.920            | 1.000 (1.000–1.000)                |
| Nowon        | 0.996                     | 0.960            | 1.000 (1.000–1.000)                |
| Gwangju      | 1                         | 0.974            | 0.907 (0.779–1.000)                |
| Daegu        | Perfect agreement         |                  | 1.000 (1.000–1.000)                |
| Jamsil       | Perfect agreement         |                  | 1.000 (1.000–1.000)                |
| Cheongju     | Perfect agreement         |                  | 1.000 (1.000–1.000)                |
| Suwon        | Perfect agreement         |                  | 1.000 (1.000–1.000)                |
| Incheon      | Perfect agreement         |                  | 1.000 (1.000–1.000)                |

**Table S2.** Causality scale for Chuna treatment.

| Causality term                  | Assessment criteria (WHO-UMC)                                                                                                                                                                                                                                                                                                                                                                                                                                                                          | Adjusted by Chuna treatment                                                                                                                                                                                                                                                                                                                                     |
|---------------------------------|--------------------------------------------------------------------------------------------------------------------------------------------------------------------------------------------------------------------------------------------------------------------------------------------------------------------------------------------------------------------------------------------------------------------------------------------------------------------------------------------------------|-----------------------------------------------------------------------------------------------------------------------------------------------------------------------------------------------------------------------------------------------------------------------------------------------------------------------------------------------------------------|
| Certain                         | <ul style="list-style-type: none"> <li>- Event or laboratory test abnormality, with plausible time relationship to drug intake</li> <li>- Cannot be explained by disease or other drugs</li> <li>- Response to withdrawal plausible (pharmacologically, pathologically)</li> <li>- Event definitive pharmacologically or phenomenologically (i.e., an objective and specific medical disorder or a recognised pharmacological phenomenon)</li> <li>- Rechallenge satisfactory, if necessary</li> </ul> | <ul style="list-style-type: none"> <li>- Plausible time relationship between therapeutic intervention and AE</li> <li>- Cannot be explained by other procedures, drugs, or diseases</li> <li>- Response to discontinuation of the therapeutic intervention plausible</li> <li>- Symptoms recur upon resuming procedure or rechallenge (if necessary)</li> </ul> |
| Probable/<br>Likely             | <ul style="list-style-type: none"> <li>- Event or laboratory test abnormality, with reasonable time relationship to drug intake</li> <li>- Unlikely to be attributed to disease or other drugs</li> <li>- Response to withdrawal clinically reasonable</li> <li>- Rechallenge not required</li> </ul>                                                                                                                                                                                                  | <ul style="list-style-type: none"> <li>- Reasonable time relationship between therapeutic intervention and AE</li> <li>- Unlikely to be attributed to other drugs, procedures, or diseases</li> <li>- Response to discontinuation of the therapeutic intervention clinically reasonable</li> <li>- Rechallenge not required</li> </ul>                          |
| Possible                        | <ul style="list-style-type: none"> <li>- Event or laboratory test abnormality, with reasonable time relationship to drug intake</li> <li>- Could also be explained by disease or other drugs</li> <li>- Information on drug withdrawal may be lacking or unclear</li> </ul>                                                                                                                                                                                                                            | <ul style="list-style-type: none"> <li>- Reasonable time relationship with the therapeutic intervention</li> <li>- Can be explained by other procedures, drugs, or diseases</li> <li>- Symptoms of treatment discontinuation are not observed or information is lacking</li> </ul>                                                                              |
| Unlikely                        | <ul style="list-style-type: none"> <li>- Event or laboratory test abnormality, with a time to drug intake that makes a relationship improbable (but not impossible)</li> <li>- Disease or other drugs provide plausible explanations</li> </ul>                                                                                                                                                                                                                                                        | <ul style="list-style-type: none"> <li>- Improbable time relationship with the therapeutic intervention</li> <li>- Explained by other procedures, drugs, or diseases</li> </ul>                                                                                                                                                                                 |
| conditional/<br>Unclassified    | <ul style="list-style-type: none"> <li>- Event or laboratory test abnormality</li> <li>- More data for proper assessment needed, or</li> <li>- Additional data under examination</li> </ul>                                                                                                                                                                                                                                                                                                            | <ul style="list-style-type: none"> <li>- Additional and more appropriate testing required.</li> </ul>                                                                                                                                                                                                                                                           |
| Unassessable/<br>Unclassifiable | <ul style="list-style-type: none"> <li>- Report suggesting an adverse reaction</li> <li>- Cannot be judged because information is insufficient or contradictory</li> <li>- Data cannot be supplemented or verified</li> </ul>                                                                                                                                                                                                                                                                          | <ul style="list-style-type: none"> <li>- Data are inadequate or unavailable. Data are contradictory</li> </ul>                                                                                                                                                                                                                                                  |

CMT: Chuna manipulation therapy, AE: adverse events, WHO-UMC: World Health Organization-Uppsala Monitoring Centre

**Table S3.** Adverse events associated with increasing musculoskeletal pain.

| Type of visit | Sex | Age, years | Comorbidity                                      | Disease classification                    | Other treatments                                             | CMT session(s) | AE symptoms                                                       | Imaging data before first CMT session                                                                         | Imaging data after onset of AE                                                     | Severity | Causality | Post-AE treatment                                         | Follow-up result                                                          |
|---------------|-----|------------|--------------------------------------------------|-------------------------------------------|--------------------------------------------------------------|----------------|-------------------------------------------------------------------|---------------------------------------------------------------------------------------------------------------|------------------------------------------------------------------------------------|----------|-----------|-----------------------------------------------------------|---------------------------------------------------------------------------|
| Outpatient    | F   | 30         | C-spine HIVD                                     | Sprain and strain of cervical spine       | CMT, acupuncture, pharmacopuncture, cupping, herbal medicine | 2              | Exacerbated upper limb Bi-jeung                                   | C-spine MRI (11.06.22) taken at another hospital showed severe cervical disc herniation; referred for surgery | C-spine MRI taken at another hospital showed no changes (as recorded on the chart) | 2        | 3         | Herbal medicine (Gal-geuntang), cervical brace prescribed | Bi-jeung continued 2 months later; no further follow-up data              |
| Outpatient    | M   | 11         | -                                                | Injury to multiple structures of knee     | CMT, acupuncture, pharmacopuncture, cupping                  | 1              | Exacerbated knee joint pain                                       | None                                                                                                          | None                                                                               | 1        | 3         | Observation of progress                                   | No follow-up data                                                         |
| Outpatient    | M   | 38         | Tricuspid insufficiency, left ankle fracture; OP | Intervertebral disc disorder, unspecified | CMT, acupuncture, pharmacopuncture, cupping, herbal medicine | 45             | Exacerbated lower back and pain in left hip and sole of left foot | L-spine MRI; disc bulge at L5-S1                                                                              | L-spine MRI; No abnormal findings                                                  | 1        | 3         | Continue current treatment and observation of progress    | Mild improvement of pain until 18 months later; no further follow-up data |

|            |   |    |                                   |                                                                                  |                                                              |    |                                |                                                                                                                |                                                                                                                 |   |   |                                                                                        |                                                                                 |
|------------|---|----|-----------------------------------|----------------------------------------------------------------------------------|--------------------------------------------------------------|----|--------------------------------|----------------------------------------------------------------------------------------------------------------|-----------------------------------------------------------------------------------------------------------------|---|---|----------------------------------------------------------------------------------------|---------------------------------------------------------------------------------|
| Outpatient | M | 71 | Parkinson's disease, constipation | Intervertebral disc disorder, unspecified                                        | CMT, acupuncture, pharmacopuncture, cupping, herbal medicine | 3  | Exacerbated right femoral pain | Both hip AP and FROG leg radiographs; osteoarthritis in the right hip joint; R/O AVN in the right femoral head | AVN diagnosed based on MRI, taken at another hospital                                                           | 3 | 3 | Surgery                                                                                | No follow-up data                                                               |
| Inpatient  | M | 41 | Tympanitis                        | Sprain and strain of lumbar spine                                                | CMT, acupuncture, pharmacopuncture, cupping, herbal medicine | 11 | New TMJ pain                   | None                                                                                                           | Radiograph of mandible (18.01.24): facial tilting<br>Radiograph of TMJ (18.01.24): No limitation on either side | 2 | 3 | Acupuncture therapy                                                                    | Symptoms alleviated 1 week later                                                |
| Outpatient | F | 52 | Hypertension                      | Cervicalgia due to intervertebral cervical disc disorder(M50.-), cervical region | CMT, acupuncture, cupping                                    | 1  | Exacerbated right ankle pain   | Whole spine radiograph: mild scoliosis in thoracic and lumbar spine                                            | None                                                                                                            | 1 | 3 | Observation (current treatment continued for lumbar and cervical areas; excluding CMT) | Mild improvement of ankle pain 5 weeks later; subsequent follow-up data lacking |
| Outpatient | F | 19 | -                                 | Intervertebral disc disorder, unspecified                                        | CMT, acupuncture, pharmacopuncture,                          | 24 | Increased lower back and lower | L-spine MRI (09.12.29): disc extrusion at L4-5                                                                 | L-spine MRI (11.07.25): disc extrusion at L4-5                                                                  | 2 | 3 | Existing Korean medicine treat-                                                        | Surgery 1 year later.                                                           |

|                 |   |    |    | cupping, herbal<br>medicine                                     |                                                                                 | limb radi-<br>ating pain | disc protrusion at<br>L5-S1                                         | disc protrusion<br>at L5-S1                                                                                                              |      |   |   |                                                                                                  | ment contin-<br>ued and N-<br>block per-<br>formed                                      |  |
|-----------------|---|----|----|-----------------------------------------------------------------|---------------------------------------------------------------------------------|--------------------------|---------------------------------------------------------------------|------------------------------------------------------------------------------------------------------------------------------------------|------|---|---|--------------------------------------------------------------------------------------------------|-----------------------------------------------------------------------------------------|--|
| Outpa-<br>tient | M | 40 | -  | Other spec-<br>ified inter-<br>vertebral<br>disc disor-<br>ders | CMT, acupunc-<br>ture,<br>pharmacopunc-<br>ture,<br>cupping, herbal<br>medicine | 8                        | Increased<br>lower<br>back and<br>lower<br>limb radi-<br>ating pain | L-spine MRI<br>(10.01.17):<br>disc extrusion<br>with inferior mi-<br>gration in L4-5,<br>possibly com-<br>pressing left L5<br>nerve root | None | 2 | 3 | Existing Ko-<br>rean medi-<br>cine treat-<br>ment contin-<br>ued and<br>nerve block<br>performed | 3 rounds of<br>nerve block<br>with herbal<br>medicine over<br>3 months; pain<br>reduced |  |
|                 |   |    |    |                                                                 |                                                                                 |                          |                                                                     | Disc extrusion in<br>L5-S1                                                                                                               |      |   |   |                                                                                                  |                                                                                         |  |
| Outpa-<br>tient | M | 33 | -  | Interverte-<br>bral disc<br>disorder,<br>unspecified            | CMT, acupunc-<br>ture,<br>pharmacopunc-<br>ture,<br>cupping, herbal<br>medicine | 17                       | Increased<br>lower<br>back and<br>lower<br>limb radi-<br>ating pain | L-spine MRI<br>(10.03.18):<br>bulging disc at<br>L3-4;<br>disc extrusion at<br>L4-5                                                      | None | 2 | 3 | Existing Ko-<br>rean medi-<br>cine treat-<br>ment contin-<br>ued and<br>nerve block<br>performed | Herbal medi-<br>cine added for<br>6 months; pain<br>reduced                             |  |
|                 |   |    |    |                                                                 |                                                                                 |                          |                                                                     |                                                                                                                                          |      |   |   |                                                                                                  |                                                                                         |  |
| Outpa-<br>tient | M | 42 | DM | Other spec-<br>ified inter-<br>vertebral<br>disc disor-<br>ders | CMT, acupunc-<br>ture,<br>pharmacopunc-<br>ture,<br>cupping, herbal<br>medicine | 12                       | Increased<br>lower<br>back and<br>lower<br>limb radi-<br>ating pain | L-spine MRI<br>(10.04.12):<br>disc protrusion at<br>L5-S1;<br>bulging disc in<br>L3-4 and L4-5                                           | None | 2 | 3 | Existing Ko-<br>rean medi-<br>cine contin-<br>ued with oral<br>Western an-<br>algesics           | Herbal medi-<br>cine added for<br>4 months; pain<br>reduced                             |  |
|                 |   |    |    |                                                                 |                                                                                 |                          |                                                                     |                                                                                                                                          |      |   |   |                                                                                                  |                                                                                         |  |

|            |   |    |                            |                                               |                                                              |    |                                                    |                                                                                                    |                                                                                                                                                                |   |   |                                                                            |                                                                                                                   |
|------------|---|----|----------------------------|-----------------------------------------------|--------------------------------------------------------------|----|----------------------------------------------------|----------------------------------------------------------------------------------------------------|----------------------------------------------------------------------------------------------------------------------------------------------------------------|---|---|----------------------------------------------------------------------------|-------------------------------------------------------------------------------------------------------------------|
| Outpatient | M | 28 | L-spine HIVD               | Intervertebral disc disorder, unspecified     | CMT, acupuncture, pharmacopuncture, cupping, herbal medicine | 2  | Increased lower back and lower limb radiating pain | L-spine MRI (08.11.13): L4-5 and 5-S1 disc extrusion, indentation of both L5 and S1 roots          | L-spine MRI (10.07.17): L4-5: disc extrusion, compression of both L5 nerve roots<br>L5-S1: disc extrusion and compression of thecal sac and left S1 nerve root | 2 | 3 | Existing Korean medicine continued and nerve block performed               | 3 nerve blocks, 3 rounds of FIMS, and herbal medicine over 3 months but pain persisted. No further follow-up data |
| Outpatient | M | 34 | L-spine HIVD               | Other specified intervertebral disc disorders | CMT, acupuncture, pharmacopuncture, cupping, herbal medicine | 24 | Increased lower back and lower limb radiating pain | L-spine MRI (09.06.25): disc protrusion in L4-5 and L3-4                                           | L-spine MRI (11.02.15): disc protrusion in L4-5 and L3-4                                                                                                       | 2 | 3 | Existing Korean medicine continued, nerve block and oral Western analgesia | One nerve block over 3 months combined with herbal medicine; pain mildly improved                                 |
| Outpatient | M | 62 | Hypertension, Pneumothorax | Intervertebral disc disorder, unspecified     | CMT, acupuncture, pharmacopuncture, cupping, herbal medicine | 3  | Increased lower back and lower limb radiating pain | L-spine MRI (10.06.07): disc extrusion in L1-2 and L2-3<br>Bulging disc in L3-4 and L4-5 and L5-S1 | None                                                                                                                                                           | 2 | 3 | Existing Korean medicine treatment continued and OS injection added        | 10.06.19 OS raised suspicion for an L2-3 tumour, and advanced testing recommended. No further follow-up data.     |

|            |   |    |                                                 |                                           |                                                              |    |                                                    |                                                                                                  |       |   |   |                                                                              |                                                                          |
|------------|---|----|-------------------------------------------------|-------------------------------------------|--------------------------------------------------------------|----|----------------------------------------------------|--------------------------------------------------------------------------------------------------|-------|---|---|------------------------------------------------------------------------------|--------------------------------------------------------------------------|
| Outpatient | M | 37 | -                                               | Intervertebral disc disorder, unspecified | CMT, acupuncture, pharmacopuncture, cupping, herbal medicine | 1  | Increased lower back and lower limb radiating pain | L-spine MRI (10.07.09): disc protrusion in L3-4 disc extrusion in L4-5 and L5-S1                 | None  | 2 | 3 | Existing Korean medicine treatment continued and nerve block performed       | Herbal medicine added for 5 months, pain reduced                         |
| Outpatient | M | 30 | L-spine HIVD-nerve-block, Cholinergic urticaria | Intervertebral disc disorder, unspecified | CMT, acupuncture, pharmacopuncture, cupping, herbal medicine | 16 | Increased lower back and lower limb radiating pain | L-spine MRI (11.04.19): disc extrusion at L4-5                                                   | None  | 2 | 3 | Existing Korean medicine continued and nerve block performed (excluding CMT) | Nerve block and herbal medicine continued for 1 year but pain persistent |
| Outpatient | F | 55 | L-spine HIVD-nerve-block, DM injection          | Intervertebral disc disorder, unspecified | CMT, acupuncture, pharmacopuncture, cupping, herbal medicine | 1  | Increased lower back and lower limb radiating pain | L-spine MRI (10.12.20, another hospital): L2-3 and L3-4 and L4-5 extrusion with upward migration | None  | 2 | 3 | Observation of progress                                                      | No follow-up data                                                        |
| Outpatient | M | 69 | L-spine stenosis, BPH                           | Intervertebral disc disorder, unspecified | CMT, acupuncture, pharmacopuncture, cupping, herbal medicine | 1  | Increased lower back and lower limb radiating pain | L-spine MRI (11.12.04): bulging disc at L2-3; disc extrusion with caudal migration in L4-5;      | None. | 2 | 3 | Existing Korean medicine continued with oral Western analgesics              | Persistent pain until 10 days later<br>No further follow-up data         |

|            |   |    |                              |                                                                           |                                                              |    |                                                               |                                                                                              |                                                                                               |   |   |                          |                                              |
|------------|---|----|------------------------------|---------------------------------------------------------------------------|--------------------------------------------------------------|----|---------------------------------------------------------------|----------------------------------------------------------------------------------------------|-----------------------------------------------------------------------------------------------|---|---|--------------------------|----------------------------------------------|
|            |   |    |                              |                                                                           |                                                              |    | central spinal stenosis at L4-5;<br>disc protrusion at L5-S1. |                                                                                              |                                                                                               |   |   |                          |                                              |
| Outpatient | F | 44 | L-spine HIVD                 | Lumbar and other intervertebral disc disorders with radiculopathy(G55.1*) | CMT, acupuncture, pharmacopuncture, cupping, herbal medicine | 2  | Increased lower back and lower limb radiating pain            | L-spine MRI (12.01.20, another hospital): disc extrusion and central spinal stenosis in L4-5 | None                                                                                          | 2 | 3 | Referred for nerve block | No follow-up data                            |
| Outpatient | F | 28 | -                            | Intervertebral disc disorder, unspecified                                 | CMT, acupuncture, pharmacopuncture, cupping, herbal medicine | 10 | Increased lower back and lower limb radiating pain            | L-spine MRI (11.09.21): disc protrusion at L4-5<br>disc protrusion and bulging disc at L5-S1 | L-spine MRI (12.01.27): disc protrusion at L4-5;<br>disc protrusion and bulging disc at L5-S1 | 2 | 3 | Nerve block performed    | Three nerve blocks over 3 months and surgery |
| Outpatient | M | 58 | Stenosis OP-laminectomy, BPH | Spinal stenosis, lumbar region                                            | CMT, acupuncture, pharmacopuncture, cupping, herbal medicine | 1  | Increased right leg numbness                                  | L-spine MRI (11.09.01): L4-5 spinal stenosis decompression postoperatively                   | None                                                                                          | 1 | 3 | Observation of progress  | No follow-up data                            |
| Outpatient | M | 37 | -                            | Lumbar and other                                                          | CMT, acupuncture,                                            | 1  | Exacerbated right leg                                         | L-spine MRI (11.06.11, another hospital):                                                    | None                                                                                          | 2 | 3 | Observation of progress  | Mildly improved 2 weeks later                |



|            |   |    |              |                                                                           |                                                              |    |                                                    |                                                                                                     |                                                                                                                                                      |   |   |                                                                    |                                                                                                     |
|------------|---|----|--------------|---------------------------------------------------------------------------|--------------------------------------------------------------|----|----------------------------------------------------|-----------------------------------------------------------------------------------------------------|------------------------------------------------------------------------------------------------------------------------------------------------------|---|---|--------------------------------------------------------------------|-----------------------------------------------------------------------------------------------------|
|            |   |    |              | intervertebral disc disorders with radiculopathy(G55.1*)                  | pharmacopuncture, cupping, herbal medicine                   |    | numbness                                           | disc protrusion at L4-5 and L5-S1                                                                   |                                                                                                                                                      |   |   |                                                                    |                                                                                                     |
| Inpatient  | M | 52 | L-spine HIVD | Lumbar and other intervertebral disc disorders with radiculopathy(G55.1*) | CMT, acupuncture, pharmacopuncture, cupping, herbal medicine | 10 | Increased lower back and lower limb radiating pain | L-spine MRI (14.09.16): disc protrusion; L4-5 and L5-S1 disc protrusion with nerve root compression | L-spine MRI (19.09.04): disc protrusion at L2-3; disc bulging at L3-4 L4-5 disc protrusion with right L5 nerve root compression; disc bulge at L5-S1 | 2 | 3 | Existing Korean medicine continued with herbal medicine (Kungak)   | Improved 2 weeks later                                                                              |
| Outpatient | F | 42 | -            | Intervertebral disc disorder, unspecified                                 | CMT, acupuncture, pharmacopuncture, herbal medicine          | 13 | Exacerbated bilateral knee joint pain              | None.                                                                                               | MRI of both knees '(12.10.18): R/O fat pad impingement syndrome; differential diagnosis: non-specific inflammatory change                            | 2 | 3 | Herbal medicine (Gwanjulhwan) and Western analgesics PO prescribed | Rheumatoid test performed 5 weeks later was negative; patient sought care at another hospital since |

|            |   |    |      |                                           |                                                              |   |                                          |                                                                                                                                                                                     |      |   |   |                                                         |                                                        |
|------------|---|----|------|-------------------------------------------|--------------------------------------------------------------|---|------------------------------------------|-------------------------------------------------------------------------------------------------------------------------------------------------------------------------------------|------|---|---|---------------------------------------------------------|--------------------------------------------------------|
| Outpatient | F | 30 | Wart | Cervical disc disorder, unspecified       | CMT, acupuncture, pharmacopuncture, herbal medicine          | 1 | Exacerbation of neck pain                | CTL MRI (10.01.20)<br>C4-5 and C5-6: suggestive of mild disc herniation                                                                                                             | None | 1 | 3 | Current treatment continued and observation of progress | Improved 1 week later                                  |
| Outpatient | F | 49 | -    | Intervertebral disc disorder, unspecified | CMT, acupuncture, pharmacopuncture, herbal medicine          | 1 | Increased low back pain                  | L-spine MRI (11.02.17):<br>Disc bulging with annular tear at L4-5; disc protrusion at L5-S1                                                                                         | None | 1 | 3 | Current treatment continued and observation of progress | Pain improved 2 weeks later; no further follow-up data |
| Outpatient | M | 62 | BPH  | Spondylolisthesis, lumbar region          | CMT, acupuncture, pharmacopuncture, cupping, herbal medicine | 6 | Exacerbated lower back and left leg pain | L-spine MRI (16.12.17):<br>T12-L1, L1-2, L2-3 and L-4: bulging disc with thecal sac mild compression; L4-5: extrusion, foraminal stenosis, degenerative spondylolisthesis (grade 1) | None | 1 | 3 | Observation of progress                                 | No follow-up data                                      |
| Outpatient | F | 30 | -    | Sprain and strain of lumbar spine         | CMT, acupuncture, herbal medicine                            | 1 | Exacerbated low back pain                | None                                                                                                                                                                                | None | 1 | 3 | Current treatment continued and                         | Symptoms improved 3 days later                         |

|            |   |    |                               |                                                                           |                                                              |    |                                                             |                                                                                                 |      |   |   | observation<br>of progress                                        |                                                                                      |
|------------|---|----|-------------------------------|---------------------------------------------------------------------------|--------------------------------------------------------------|----|-------------------------------------------------------------|-------------------------------------------------------------------------------------------------|------|---|---|-------------------------------------------------------------------|--------------------------------------------------------------------------------------|
| Outpatient | M | 30 | L-spine HIVD<br>OP-discectomy | Other specified intervertebral disc disorders                             | CMT, acupuncture, pharmacopuncture, herbal medicine          | 38 | Exacerbated left leg pain and transient sense of enervation | L-spine MRI (11.04.25): disc protrusion at L4-5 and L5-S1                                       | None | 2 | 2 | Icepack, injection of analgesics, and current treatment continued | Mild improvement after bedrest immediately after treatment; improvement 3 days later |
| Inpatient  | F | 36 | Orthostatic hypotension       | Lumbar and other intervertebral disc disorders with radiculopathy(G55.1*) | CMT, acupuncture, pharmacopuncture, cupping, herbal medicine | 15 | Exacerbated low back pain                                   | L-spine MRI (15.09.21): L3-4 protrusion; L4-5 disc extrusion and bulging; L5-S1 disc protrusion | None | 1 | 3 | Current treatment continued and observation of progress           | Mild improvement after 6 weeks of Korean medicine                                    |

CMT: Chuna manipulation therapy, AE: adverse events, HIVD: herniated intervertebral disc, OP:operation, AVN: Avascular necrosis of the femoral head, TMJ: temporomandibular joint, R/O: reverse oblique, BPH: , MRI: magnetic resonance imaging

**Table S4.** Adverse events associated with rib fracture.

| Visit type | Sex | Age, years | Comorbidity                                                | Chief complaint  | CMT session(s) | AE symptoms      | Diagnostic test result                                           | Severity | Causality | Post-AE treatment                                                     | Follow-up result                                             |
|------------|-----|------------|------------------------------------------------------------|------------------|----------------|------------------|------------------------------------------------------------------|----------|-----------|-----------------------------------------------------------------------|--------------------------------------------------------------|
| Outpatient | F   | 73         | Hysterectomy, compression fracture                         | L-spine          | 1              | Left flank pain  | R/O incomplete fracture at left 3rd and 4th ribs on a radiograph | 2        | 3         | Observation of progress                                               | No follow-up data                                            |
| Outpatient | F   | 66         | HIVD of L-spine OP, hypertension                           | L-spine, knee    | 4              | Right flank pain | Right rib fracture on a radiograph                               | 2        | 1         | Herbal medicine (Jeopgol)                                             | Symptoms improved 2 weeks later                              |
| Outpatient | F   | 70         | -                                                          | L-spine          | 3              | Left flank pain  | Acute fracture at left 3rd and 4th ribs on a radiograph and MRI  | 2        | 1         | Herbal medicine (Jeopgol)                                             | Pain improved 4 weeks later                                  |
| Outpatient | F   | 54         | Hypertension, osteopenia                                   | L-spine, C-spine | 29             | Left flank pain  | R/O fracture, left 10th posterior arc on radiograph;             | 2        | 1         | Herbal medicine (Goldagonghwan), oral and injected Western analgesics | Pain continued 1 week later, no further follow-up data       |
| Inpatient  | F   | 85         | Arthritis, hypertension, left leg fracture, OP, osteopenia | L-spine, C-spine | 6              | Right flank pain | probable fracture of right 3rd rib on a radiograph               | 2        | 2         | Observation of progress                                               | Pain continued for 3 weeks later; no further follow-up data  |
| Outpatient | F   | 72         | HTN, DM                                                    | L-spine          | 2              | Flank pain       | WNL on a radiograph; rib fracture on a bone scan                 | 2        | 1         | Observation of progress                                               | Mild pain continued 2 weeks later; no further follow-up data |
| Inpatient  | F   | 68         | -                                                          | L-spine          | 16             | Right flank pain | Right 3rd rib fracture on a radiograph                           | 2        | 1         | Observation of progress                                               | Mild pain continued 2 weeks                                  |

|            |   |    |                                                           |                  |    |                     |                                                                      |   |   |                                                |                                                                               |
|------------|---|----|-----------------------------------------------------------|------------------|----|---------------------|----------------------------------------------------------------------|---|---|------------------------------------------------|-------------------------------------------------------------------------------|
|            |   |    |                                                           |                  |    |                     |                                                                      |   |   |                                                | later;<br>no further fol-<br>low-up data                                      |
| Outpatient | F | 78 | Hyperlipidaemia                                           | L-spine,<br>Knee | 3  | Left flank<br>pain  | Left 5 <sup>th</sup> and 6th rib fractures on<br>a radiograph        | 2 | 1 | Herbal medicine<br>(Dangguisusan)              | Mild pain contin-<br>ued 2 weeks later<br>No further fol-<br>low-up data      |
| Outpatient | F | 78 | Hypertension,<br>arrhythmia,<br>urinary incon-<br>tinence | L-spine          | 2  | Right<br>flank pain | Right 3rd rib fracture on a radi-<br>ograph                          | 2 | 1 | Herbal medicine<br>(Jeopgol)                   | Pain improved 2<br>weeks later                                                |
| Outpatient | F | 57 | -                                                         | C-spine          | 20 | Left flank<br>pain  | WNL on a radiograph;<br>rib fracture on an ultrasonogra-<br>phy scan | 2 | 1 | Physiotherapy,<br>herbal medicine<br>(Jeopgol) | Mild pain contin-<br>ued 4 months<br>later;<br>no further fol-<br>low-up data |
| Inpatient  | F | 62 | L-spine HIVD                                              | L-spine          | 9  | Right<br>flank pain | Right 4th rib fracture on a radi-<br>ograph                          | 2 | 1 | Observation of pro-<br>gress                   | Mild pain contin-<br>ued 4 weeks later                                        |

CMT: Chuna manipulation therapy, AE: adverse events, R/O: reverse oblique, HIVD: herniated intervertebral disc, OP: , WNL: within normal limits, HTN: hypertension, DM: diabetes mellitus

Table S5. Adverse events associated with falls.

| Type of visit | Sex | Age, years | Comorbidity                                              | Circumstances of fall                                                                                                       | AE symptoms                                                 | Diagnostic test result                                         | AE severity | Causality | Post-AE treatment                           | Follow-up result                                                                |
|---------------|-----|------------|----------------------------------------------------------|-----------------------------------------------------------------------------------------------------------------------------|-------------------------------------------------------------|----------------------------------------------------------------|-------------|-----------|---------------------------------------------|---------------------------------------------------------------------------------|
| Inpatient     | F   | 62         | Compression fracture at L5; left tympanum OP             | Fell while changing to a supine position from a lateral position; fell on the right wrist                                   | Right wrist pain                                            | WNL on radiograph of the right wrist                           | 1           | 1         | Observation of progress                     | Pain resolved after 24 hours                                                    |
| Inpatient     | M   | 73         | Herniotomy, BPH C-spine HIVD OP, DM, Osteoporosis        | Tension caused by trying to support the body when patient almost fell during CMT provoked pain                              | Existing symptoms exacerbated (right calf pain exacerbated) | No examination                                                 | 1           | 1         | Current intensive Korean medicine continued | Pain intensity reduced to below that before the onset of AE 5 days later        |
| Outpatient    | F   | 65         | Hypertension                                             | Fell while turning on the Chuna bed onto the left elbow, right hand, right rib                                              | Left elbow pain (contusion)right rib pain                   | WNL on radiograph of the left elbow and ribs                   | 1           | 1         | Observation of progress                     | Symptoms improved 15 days later                                                 |
| Inpatient     | F   | 54         | -                                                        | Fell from the Chuna bed while changing posture during treatment; contusion of the left pelvis, left shoulder, and left knee | Left pelvic, left shoulder, left knee pain                  | WNL on both hips, left shoulder, and left knee on a radiograph | 1           | 1         | Observation of progress                     | No data after discharge                                                         |
| Outpatient    | F   | 65         | Right hip joint fracture; right Hip joint replacement OP | Fell while climbing up the Chuna bed for treatment and hit the right pelvis on the floor                                    | None                                                        | No testing (patient was asymptomatic and refused radiography)  | 1           | 1         | Observation of progress                     | Treatment continued via outpatient care for 3 months; no abnormalities observed |

|            |   |    |              |                                                                                                                             |                                           |                                                           |   |   |                                                              |                                                       |
|------------|---|----|--------------|-----------------------------------------------------------------------------------------------------------------------------|-------------------------------------------|-----------------------------------------------------------|---|---|--------------------------------------------------------------|-------------------------------------------------------|
| Outpatient | F | 57 | Hypertension | Fell due to sudden dizziness while sitting up after CMT <sup>1</sup> and sustained a contusion to the left side of the head | Dizziness, left forehead pain (Contusion) | V/S stable*; ENT and neurology visit recommended, no test | 1 | 1 | Sent home after 1 hour of bedrest<br>Observation of progress | Contusion on the left forehead improved 5 days later. |
|------------|---|----|--------------|-----------------------------------------------------------------------------------------------------------------------------|-------------------------------------------|-----------------------------------------------------------|---|---|--------------------------------------------------------------|-------------------------------------------------------|

CMT: Chuna manipulation therapy, AE: adverse events, R/O: reverse oblique, HIVD: herniated intervertebral disc, OP: operation, WNL: within normal limits

\* V/S: 120/70-75-20-36.9, BST: 126 mg/dl, normally had dizziness when standing up from a sitting position.

**Table S6.** Adverse events associated with vertigo, chest pain, and discomfort.

| AE symptoms               | Type of visit | Sex | Age | Comorbidity                          | Chief complaint | CMT session(s) | Diagnostic test result                                            | Severity | Causality | Post-AE treatment                                                | Follow-up result       |
|---------------------------|---------------|-----|-----|--------------------------------------|-----------------|----------------|-------------------------------------------------------------------|----------|-----------|------------------------------------------------------------------|------------------------|
| Headache, vertigo, nausea | Inpatient     | F   | 38  | -                                    | LBP             | 6              | Brain MRI + MRA findings normal                                   | 2        | 2         | N/S 500 ml, herbal medicine, anti-inflammatory agents prescribed | Improved 5 days later  |
| Chest pain                | Outpatient    | F   | 71  | Hypertension, angina, hyperlipidemia | Lumbar          | 1              | Rib series radiograph and rib sonogram normal                     | 1        | 1         | Korean medicine treatment continued                              | Improved 1 month later |
| Chest pain                | Inpatient     | F   | 75  | Hypertension                         | Lumbar          | 3              | Rib series radiograph showed R/O compression fracture at T10–T12. | 2        | 3         | Korean medicine inpatient treatment continued                    | -                      |
| Discomfort                | Outpatient    | F   | 26  | -                                    | Cervical        | 1              | -                                                                 | 1        | 1         | -                                                                | -                      |

CMT: Chuna manipulation therapy, AE: adverse events, MRI: magnetic resonance imaging, MRA: magnetic resonance angiography, N/S: Normal Saline
